# Supplementary material
Source: Springer Nature journal article supplement (https://mijn.bsl.nl/resource/supplementary/13047_2008_10_MOESM4_ESM.pdf/7108700)

**a. Toenail**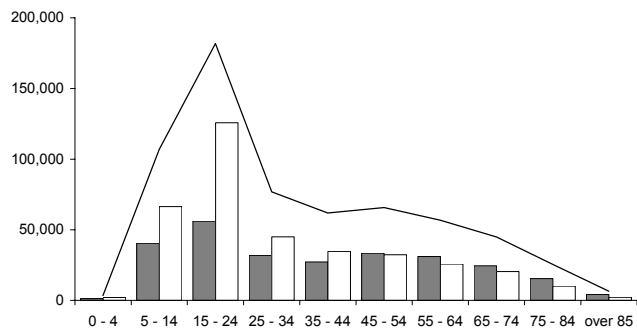**b. Trauma**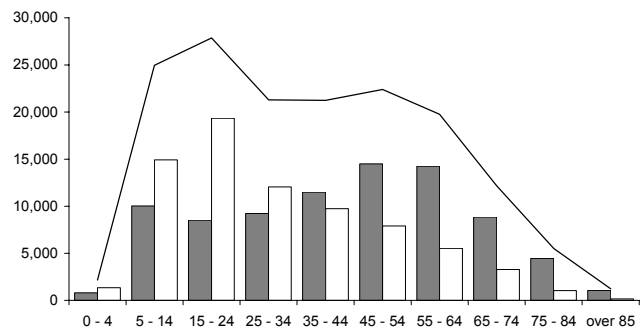**c. Lesser toes**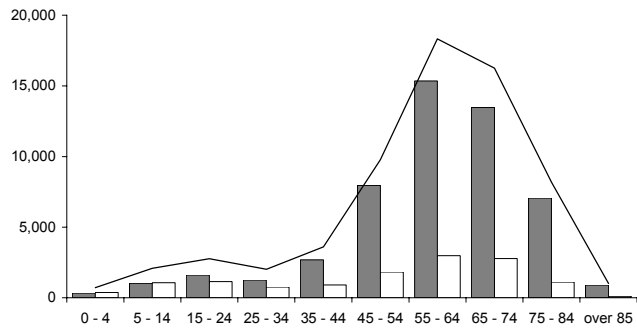**d. Ankle**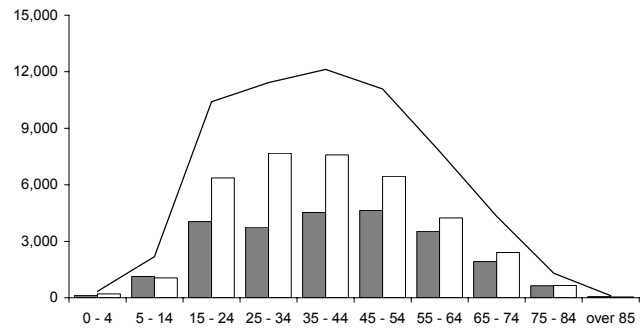**e. 1<sup>st</sup> MPJ**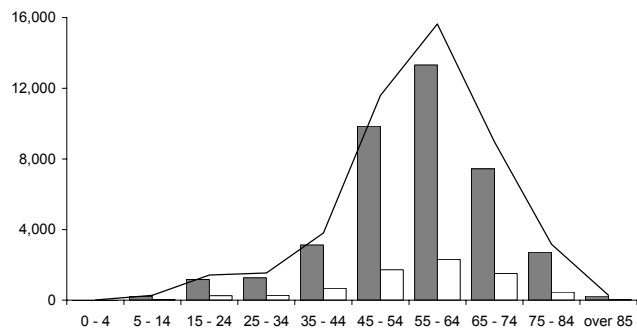**f. Neuroma**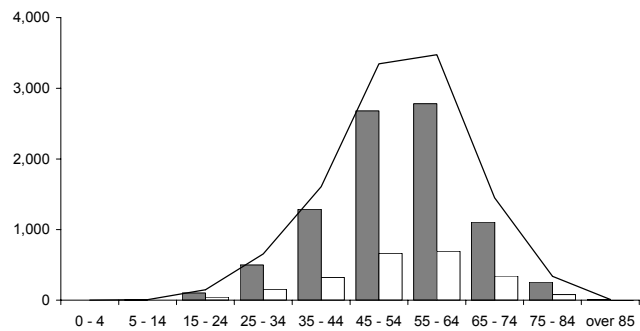**g. Amputation**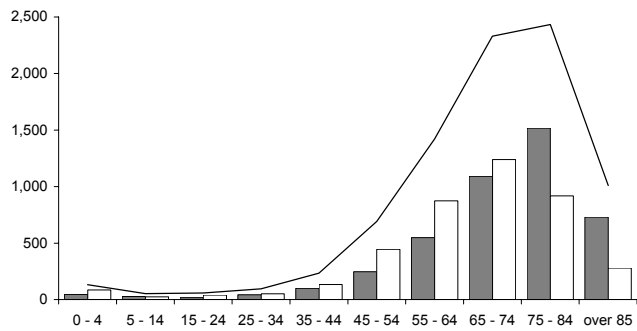**h. Clubfoot**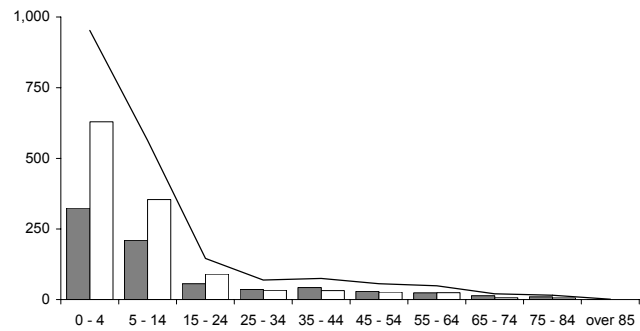

Supplement: MOESM4 [file 7108700]
